# Supplementary material for: 3-Pyridinols and 5-pyrimidinols: Tailor-made for use in synergistic radical-trapping co-antioxidant systems
Source: PubMed Central journal article supplement (PMC3869267; doi:10.3762/bjoc.9.313), 2013-12-04
Supplement: Beilstein_J_Org_Chem-09-2781-s001.pdf [file Beilstein_J_Org_Chem-09-2781-s001.pdf]

## Supporting Information

for

### **3-Pyridinols and 5-pyrimidinols: Tailor-made for use in synergistic radical-trapping co-antioxidant systems**

Luca Valgimigli<sup>1,\*</sup>, Daniele Bartolomei<sup>1</sup>, Riccardo Amorati<sup>1</sup>, Evan Haidasz<sup>2</sup>, Jason J. Hanthorn<sup>2</sup>,  
Susheel J. Nara<sup>2</sup>, Johan Brinkhorst<sup>2</sup>, and Derek A. Pratt<sup>2,\*</sup>

Address: <sup>1</sup>Department of Chemistry “G. Ciamician”, University of Bologna, Via S. Giacomo 11, I-40126 Bologna, Italy and <sup>2</sup>Department of Chemistry, University of Ottawa, 10 Marie Curie Pvt., Ottawa, Ontario, Canada K1N 6N5

Email: Luca Valgimigli\* - [luca.valgimigli@unibo.it](mailto:luca.valgimigli@unibo.it); Derek A. Pratt\* - [dpratt@uottawa.ca](mailto:dpratt@uottawa.ca)

\* Corresponding author

### **Additional experimental details, oxygen-uptake plots and FTIR spectra, as well as cartesian coordinates for calculated structures**

#### **Contents**

|                                                      |     |
|------------------------------------------------------|-----|
| Oxygen consumption plots for inhibited autoxidations | S2  |
| FTIR spectra and fittings                            | S6  |
| Examples of kinetic modelling of autoxidations       | S9  |
| Computational data                                   | S10 |

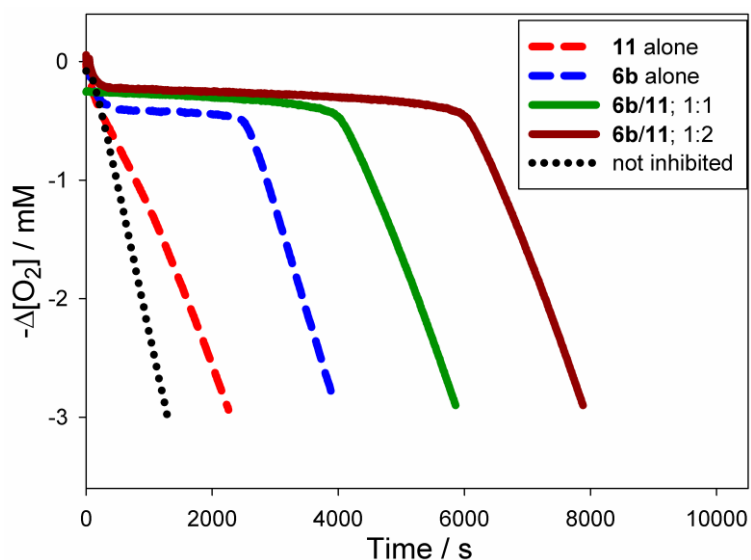

**Figure S1:** Oxygen-uptake plots recorded during the AIBN initiated autoxidation of styrene in chlorobenzene (50% v/v) at 303 K in the absence or presence of compound **6b** or **11** (either  $6.2 \times 10^{-6}$  M), or of a mixture of **6b** ( $6.2 \times 10^{-6}$  M) and one or two equivalents of **11**.

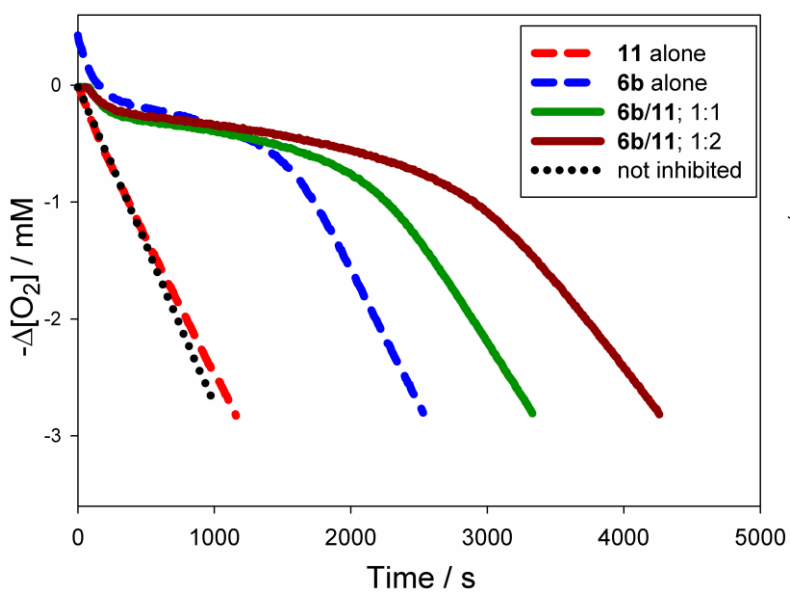

**Figure S2:** Oxygen-uptake plots recorded during the AIBN initiated autoxidation of styrene in acetonitrile (50% v/v) at 303 K in the absence or presence of compound **6b** or **11** (either  $6.2 \times 10^{-6}$  M), or of a mixture of **6b** ( $6.2 \times 10^{-6}$  M) and one or two equivalents of **11**.

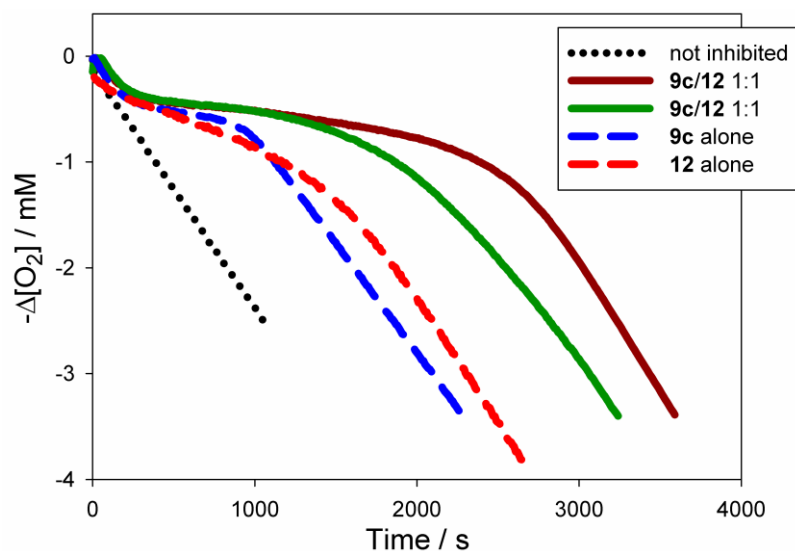

**Figure S3:** Oxygen-uptake plots recorded during the AIBN initiated autoxidation of styrene in acetonitrile (50% v/v) at 303 K in the absence or presence of compound **9c** or **12** (either  $2.5 \times 10^{-6}$  M), or of a mixture of **9c** ( $2.5 \times 10^{-6}$  M) and one or two equivalents of **12**.

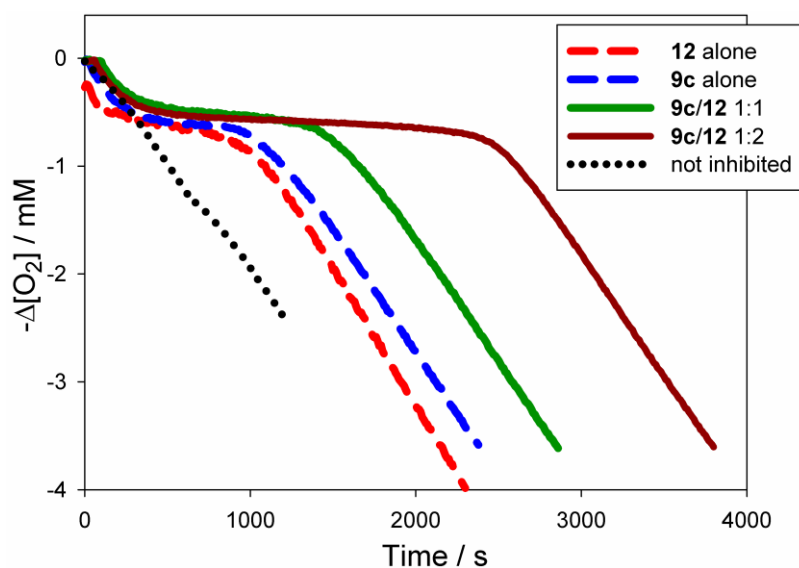

**Figure S4:** Oxygen-uptake plots recorded during the AIBN initiated autoxidation of styrene in chlorobenzene (50% v/v) at 303 K in the absence or presence of compound **9c** or **12** (either  $2.5 \times 10^{-6}$  M), or of a mixture of **9c** ( $2.5 \times 10^{-6}$  M) and one or two equivalents of **12**.

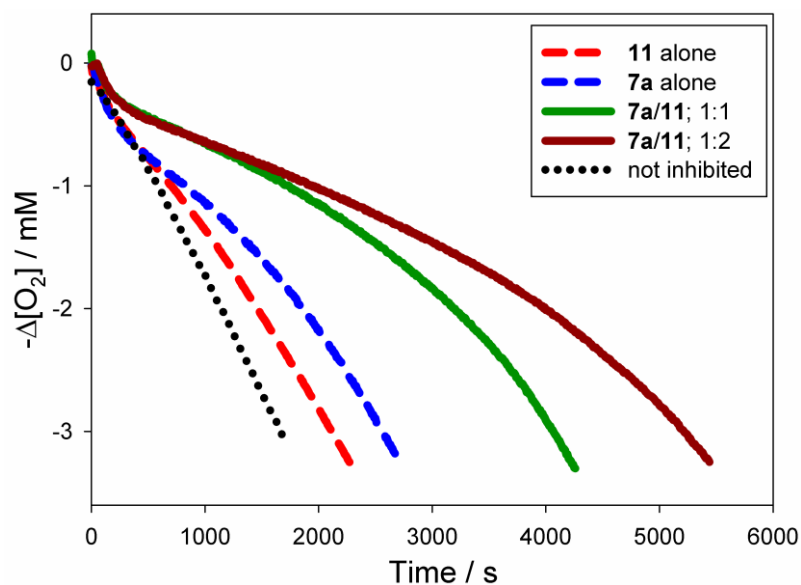

**Figure S5:** Oxygen-uptake plots recorded during the AIBN initiated autoxidation of styrene in chlorobenzene (50% v/v) at 303 K in the absence or presence of compound **7a** or **11** (either  $6.2 \times 10^{-6}$  M), or of a mixture of **7a** ( $6.2 \times 10^{-6}$  M) and one or two equivalents of **11**.

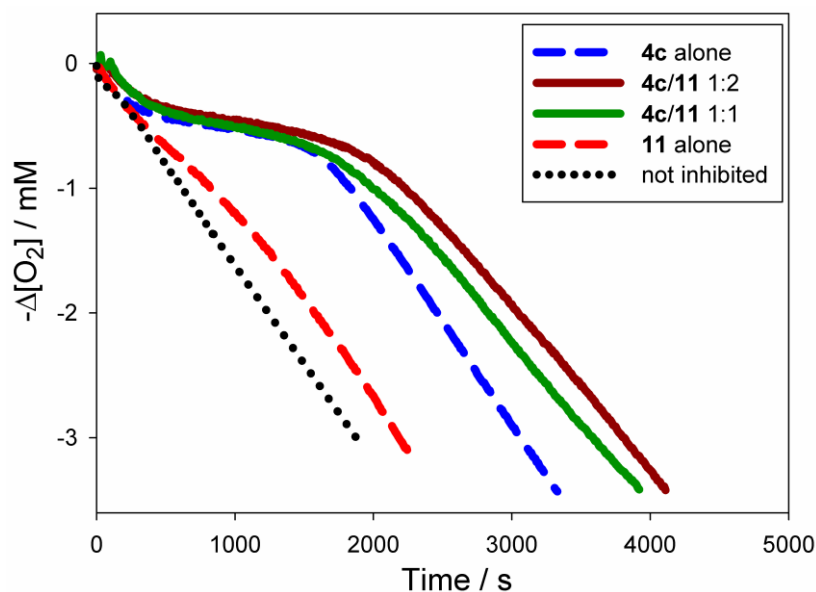

**Figure S6:** Oxygen-uptake plots recorded during the AIBN initiated autoxidation of styrene in chlorobenzene (50% v/v) at 303 K in the absence or presence of compound **4c** or **11** (either  $4.9 \times 10^{-6}$  M), or of a mixture of **4c** ( $4.9 \times 10^{-6}$  M) and one or two equivalents of **11**.

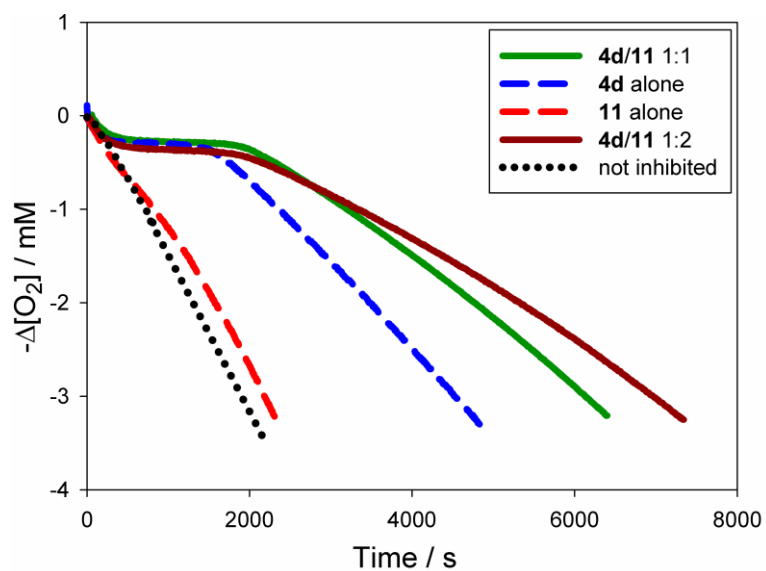

**Figure S7:** Oxygen-uptake plots recorded during the AIBN initiated autoxidation of styrene in chlorobenzene (50% v/v) at 303 K in the absence or presence of compound **4d** or **11** (either  $2.5 \times 10^{-6}$  M), or of a mixture of **4d** ( $2.5 \times 10^{-6}$  M) and one or two equivalents of **11**.

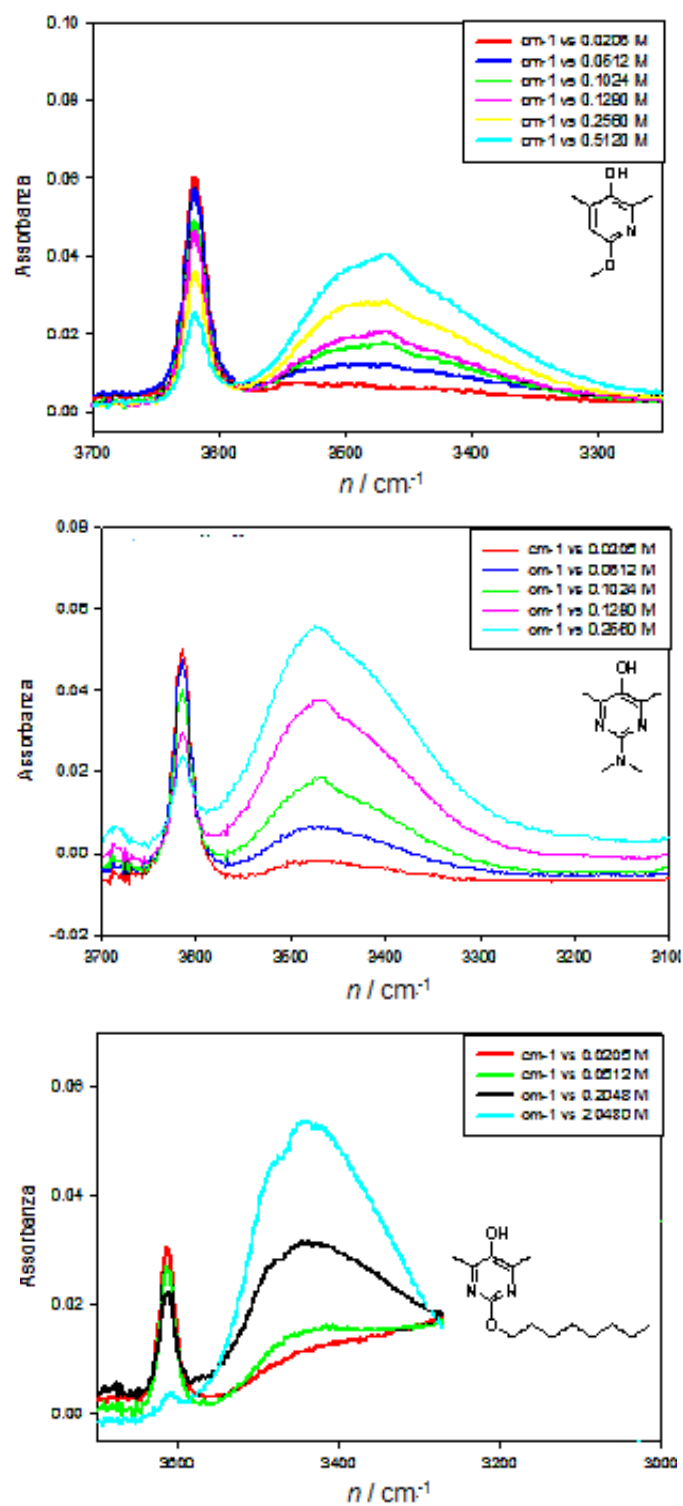

**Figure S8:** FTIR spectra recorded for compounds **5b**, **6b** and **7b** (10 mM) in  $\text{CCl}_4/\text{EtOAc}$  solvent mixtures.

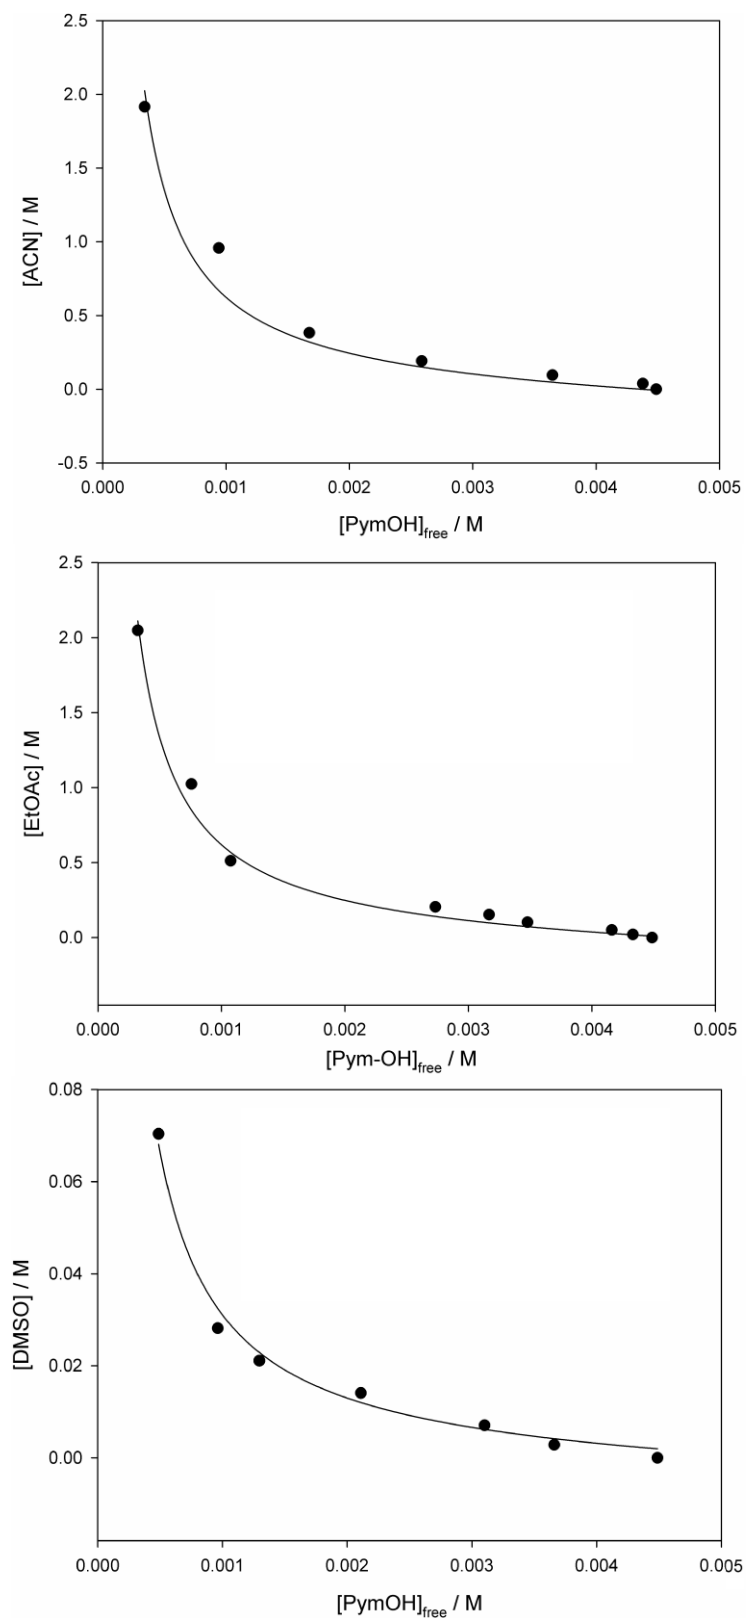

**Figure S9:** Plot of the concentration of HBA co-solvent (from left to right: acetonitrile, ethyl acetate, and dimethylsulfoxide) versus the concentration of “free” compound **7b** as determined by FTIR, fitted by equation 8 (see manuscript).

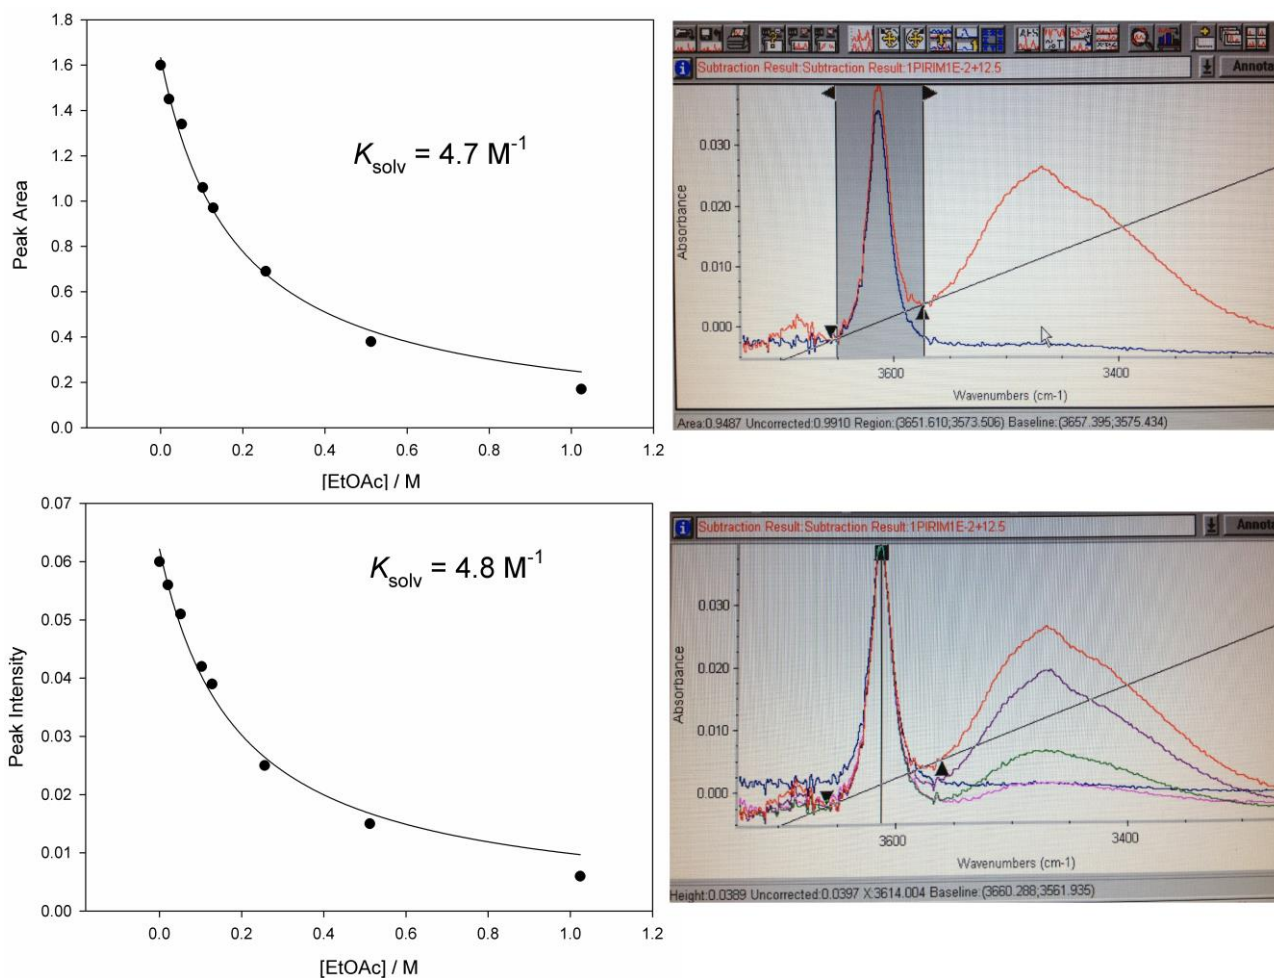

**Figure S10:** Treatment of IR data: the figure refers to IR spectra recorded for compound **6b** in solution (0.01M) using  $\text{CCl}_4/\text{EtOAc}$  mixtures with increasing concentration of the HBA co-solvent at 298 K. The top portion shows a plot of integrated peak area at  $3610 \text{ cm}^{-1}$  versus the concentration of EtOAc (left); adjacent is a screenshot illustrating the procedure for manual baseline correction (right). The lower portion shows the corresponding plot obtained using peak height (left); adjacent is a corresponding screenshot illustrating the procedure (right). Data have been fit to equation 2 (see manuscript) and afford superimposable results.



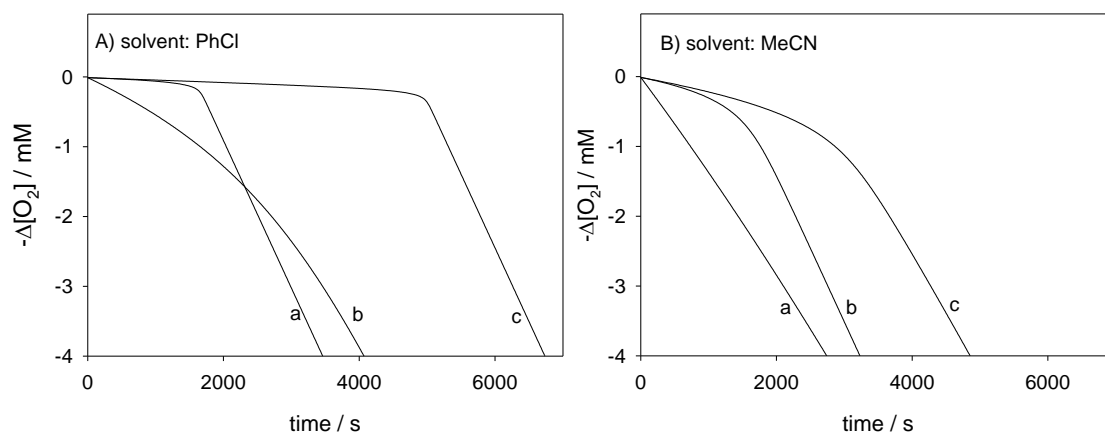

**Figure S11:** Simulated (Gepasi 3.0) oxygen consumption during the autoxidation of styrene (4.3 M) initiated by AIBN (0.05 M,  $R_i = 6 \times 10^{-9} \text{ Ms}^{-1}$ ) at 30 °C in PhCl (A) or MeCN (B) and inhibited by: a) **4a** (5  $\mu\text{M}$ ); b) **11** (10  $\mu\text{M}$ ); c) **4a** + **11** (5 + 10  $\mu\text{M}$ ).

**Table S1:** Rate constants and corresponding  $\alpha$  values calculated with Gepasi 3.0 software for the mixture **4a/11** protecting 4.3 M styrene in different solvents at 298 K. Data correspond to the plots shown in Figure S11 and have been obtained assuming  $k_7 = 1 \times 10^8 \text{ M}^{-1}\text{s}^{-1}$  (see manuscript).

|                                | Kinetic rate constants/ $\text{M}^{-1}\text{s}^{-1}$ |                   |
|--------------------------------|------------------------------------------------------|-------------------|
|                                | PhCl                                                 | MeCN              |
| $k_{\text{inh}}$ ( <b>4a</b> ) | $3.6 \times 10^6$                                    | $5.4 \times 10^5$ |
| $k_{\text{inh}}$ ( <b>11</b> ) | $1.1 \times 10^5$                                    | $2.5 \times 10^4$ |
| $k_r$                          | $5.0 \times 10^4$                                    | $1.5 \times 10^4$ |
| $k_{-r}$                       | $9.3 \times 10^2$                                    | $1.4 \times 10^2$ |
| $\alpha$                       | 1.0                                                  | 0.46              |

**Table S2:** CBS-QB3-Calculated enthalpies at 298 K and minimum energy geometries of compounds **4–12**.

**4°**  $H = -456.68707$  a.u.

|   |             |             |             |
|---|-------------|-------------|-------------|
| C | 0.59188800  | 0.01649000  | 0.07058900  |
| C | -1.38563900 | -1.17640700 | 0.03167100  |
| C | -2.17086900 | -0.02613200 | -0.00903000 |
| C | -1.50858800 | 1.19913200  | -0.02833000 |
| C | -0.12169700 | 1.23261200  | 0.00482300  |
| H | -1.86888200 | -2.14957600 | 0.03094000  |
| H | -2.06939300 | 2.12872600  | -0.07735700 |
| H | 0.38597800  | 2.18583100  | -0.02488500 |
| N | -0.05647300 | -1.15951700 | 0.06649100  |
| N | 1.97637200  | -0.02361900 | 0.16480600  |
| C | 2.67197700  | -1.27243200 | -0.11566900 |
| H | 2.86371900  | -1.41214100 | -1.19075500 |
| H | 3.62962800  | -1.27441200 | 0.41027400  |
| H | 2.06749700  | -2.10549200 | 0.23145200  |
| C | 2.73943400  | 1.19429200  | -0.02314300 |
| H | 3.78918400  | 0.98483800  | 0.18461400  |
| H | 2.66807700  | 1.59834700  | -1.04585500 |
| H | 2.41713500  | 1.97199000  | 0.67450300  |
| O | -3.53478700 | -0.16914200 | -0.04103200 |
| H | -3.94297200 | 0.70164900  | -0.06923300 |

**4a●**  $H = -456.06546$  a.u.

|   |             |             |             |
|---|-------------|-------------|-------------|
| C | 0.52843200  | 0.00982800  | -0.00014200 |
| C | -1.42988500 | -1.19407700 | -0.00014900 |
| C | -2.27995100 | -0.01464300 | 0.00001000  |
| C | -1.55145900 | 1.23533700  | 0.00021100  |
| C | -0.18559600 | 1.24801500  | 0.00014400  |
| H | -1.92518700 | -2.16241300 | -0.00021500 |
| H | -2.12658400 | 2.15427700  | 0.00046800  |
| H | 0.34786000  | 2.18925200  | 0.00040400  |
| N | -0.11750400 | -1.18188500 | -0.00021700 |
| N | 1.89334600  | -0.02309000 | -0.00039200 |
| C | 2.63163100  | -1.28200900 | 0.00043900  |
| H | 3.26805400  | -1.34700900 | -0.88830700 |
| H | 3.26648600  | -1.34687300 | 0.89033900  |
| H | 1.92349700  | -2.10423200 | -0.00009600 |
| C | 2.67628100  | 1.20457100  | -0.00018000 |
| H | 3.73290000  | 0.94252800  | -0.00174700 |
| H | 2.47496000  | 1.81218600  | -0.88850700 |
| H | 2.47715300  | 1.81064300  | 0.88973500  |
| O | -3.52584500 | -0.09445900 | 0.00002400  |

**4b**  $H = -535.15109$  a.u.

|   |             |             |             |
|---|-------------|-------------|-------------|
| C | 0.99352900  | 0.04235300  | -0.07676200 |
| C | -0.95598000 | -1.21192300 | -0.02453100 |
| C | -1.75007100 | -0.06058200 | -0.00230300 |
| C | -1.13447700 | 1.19377000  | 0.00248500  |
| C | 0.25684100  | 1.24115000  | -0.02901600 |
| H | 0.74719700  | 2.20441500  | -0.01131600 |
| N | 0.37601500  | -1.14886000 | -0.05758400 |
| N | 2.38096400  | 0.03211500  | -0.16891900 |
| C | 3.10369700  | -1.19270900 | 0.14464800  |
| H | 4.06923700  | -1.17893300 | -0.36669700 |
| H | 3.28277500  | -1.30951400 | 1.22493700  |
| H | 2.52693400  | -2.04738000 | -0.19684400 |
| C | 3.11438600  | 1.26997500  | 0.00343000  |
| H | 4.16971900  | 1.08259400  | -0.19781500 |
| H | 2.77615300  | 2.02920100  | -0.70683800 |
| H | 3.02999600  | 1.68839600  | 1.01965500  |
| O | -3.11695500 | -0.23374200 | 0.03056500  |
| H | -3.54902700 | 0.62514900  | 0.03403100  |
| C | -1.96137800 | 2.45432100  | 0.05018200  |
| H | -2.62193200 | 2.53724600  | -0.82131200 |
| H | -2.59075600 | 2.49106900  | 0.94740400  |
| H | -1.32626700 | 3.34061300  | 0.06132700  |
| C | -1.59686900 | -2.57369900 | -0.00729700 |
| H | -2.22603100 | -2.70163700 | 0.87866100  |
| H | -2.24824000 | -2.71195200 | -0.87564700 |
| H | -0.82103700 | -3.33805700 | -0.01357600 |

**4b•**  $H = -534.53437$  a.u.

|   |             |             |             |
|---|-------------|-------------|-------------|
| C | 0.94464000  | 0.03652100  | -0.00823000 |
| C | -0.98022500 | -1.23814200 | -0.00410000 |
| C | -1.84512500 | -0.05853800 | -0.00109300 |
| C | -1.16515600 | 1.22684100  | 0.00216200  |
| C | 0.20503400  | 1.25484500  | -0.00079500 |
| H | 0.71918700  | 2.20748500  | 0.00672600  |
| N | 0.33561800  | -1.17228100 | -0.00716000 |
| N | 2.31225100  | 0.04002500  | -0.01867500 |
| C | 3.08452500  | -1.19657100 | 0.02645100  |
| H | 3.76075600  | -1.24976400 | -0.83297300 |
| H | 3.68248200  | -1.23991000 | 0.94373400  |
| H | 2.39992300  | -2.03806800 | 0.00254200  |
| C | 3.06258500  | 1.28702000  | -0.01134800 |
| H | 4.12403900  | 1.05418100  | -0.08024900 |
| H | 2.79868600  | 1.91984400  | -0.86418600 |
| H | 2.89736500  | 1.85757500  | 0.90964100  |
| O | -3.09089500 | -0.16072300 | 0.00052000  |
| C | -2.00849200 | 2.46471000  | 0.01112800  |
| H | -2.66996100 | 2.48067400  | -0.85979700 |
| H | -2.66509300 | 2.47183200  | 0.88583500  |
| H | -1.39861400 | 3.37010000  | 0.01394300  |
| C | -1.63335200 | -2.58650100 | -0.00378300 |

|   |             |             |             |
|---|-------------|-------------|-------------|
| H | -2.28038400 | -2.69778500 | 0.87130100  |
| H | -2.28601200 | -2.69538100 | -0.87494000 |
| H | -0.87689700 | -3.37030600 | -0.00724200 |

4c  $H = -574.376546$  a.u.

|   |             |             |             |
|---|-------------|-------------|-------------|
| C | 0.90568600  | -0.10906800 | -0.09555300 |
| C | -1.03205800 | -1.36840200 | 0.02911400  |
| C | -1.81068300 | -0.20882100 | 0.05788100  |
| C | -1.20168200 | 1.04930900  | -0.02424800 |
| C | 0.19489000  | 1.10978000  | -0.14364300 |
| N | 0.29852600  | -1.29499900 | -0.02655400 |
| N | 2.32612600  | -0.10579700 | -0.16412200 |
| C | 2.93066200  | -1.34519900 | -0.64494000 |
| H | 3.98652800  | -1.15268600 | -0.85480900 |
| H | 2.85653200  | -2.17028500 | 0.07729000  |
| H | 2.44159300  | -1.66274000 | -1.56531100 |
| C | 2.99438300  | 0.38326100  | 1.04323500  |
| H | 4.05317100  | 0.55285700  | 0.82910400  |
| H | 2.56160600  | 1.32812500  | 1.37089100  |
| H | 2.92187800  | -0.33425000 | 1.87715600  |
| O | -3.17109000 | -0.37531300 | 0.15212200  |
| H | -3.60612200 | 0.48134500  | 0.11299300  |
| C | -2.07235100 | 2.28467400  | -0.01434600 |
| H | -2.61893400 | 2.40618700  | -0.95769000 |
| H | -2.81250100 | 2.23940400  | 0.79342100  |
| H | -1.49389100 | 3.19224500  | 0.14571200  |
| C | -1.67280900 | -2.72882700 | 0.07429400  |
| H | -2.27773800 | -2.85173200 | 0.97776400  |
| H | -2.34588100 | -2.87769500 | -0.77571600 |
| H | -0.89480100 | -3.49105000 | 0.05580900  |
| C | 0.91437900  | 2.41504700  | -0.38386000 |
| H | 1.06597600  | 2.99139700  | 0.53665400  |
| H | 1.89461400  | 2.21331400  | -0.81577400 |
| H | 0.36162300  | 3.05312700  | -1.07733800 |

4c•  $H = -573.754761$  a.u.

|   |             |             |             |
|---|-------------|-------------|-------------|
| C | 0.85403300  | -0.17663300 | -0.07718600 |
| C | -1.12315500 | -1.37067700 | -0.00892800 |
| C | -1.91796800 | -0.15303400 | 0.12624400  |
| C | -1.18733400 | 1.10300200  | 0.01225200  |
| C | 0.18480000  | 1.09376100  | -0.13231800 |
| N | 0.19003800  | -1.35241600 | -0.09195900 |
| N | 2.23226700  | -0.28011600 | -0.06813100 |
| C | 2.84589000  | -1.56988800 | -0.36978200 |
| H | 3.87187900  | -1.38909800 | -0.70132200 |
| H | 2.86950800  | -2.22929900 | 0.50688400  |
| H | 2.29093000  | -2.07287400 | -1.15655000 |
| C | 3.06095700  | 0.56704700  | 0.78544100  |
| H | 3.91696700  | 0.96595500  | 0.23238100  |
| H | 2.48904700  | 1.39312300  | 1.19502100  |
| H | 3.44436900  | -0.02389100 | 1.62774000  |

|   |             |             |             |
|---|-------------|-------------|-------------|
| O | -3.15664200 | -0.20635100 | 0.28027000  |
| C | -2.00148700 | 2.36605900  | -0.00613300 |
| H | -2.04801100 | 2.79386800  | -1.01474900 |
| H | -3.01990700 | 2.13877100  | 0.30569000  |
| H | -1.58211300 | 3.13176100  | 0.65191100  |
| C | -1.83418700 | -2.68858000 | -0.03435100 |
| H | -2.45824200 | -2.80421200 | 0.85611500  |
| H | -2.51642000 | -2.74071400 | -0.88868900 |
| H | -1.11113000 | -3.50136600 | -0.09142800 |
| C | 0.92286900  | 2.37413000  | -0.45883500 |
| H | 1.13728300  | 2.98344700  | 0.42638300  |
| H | 1.86740300  | 2.16981500  | -0.96328500 |
| H | 0.31893400  | 2.99213400  | -1.12605400 |

**4d**  $H = -535.162191$  a.u.

|   |             |             |             |
|---|-------------|-------------|-------------|
| C | 1.16671300  | 0.05283300  | 0.02088400  |
| C | -0.62520900 | -1.40160300 | 0.02236200  |
| C | -1.52193800 | -0.33623400 | -0.00284700 |
| C | -1.04887800 | 0.98644900  | -0.02062700 |
| C | 0.33308700  | 1.19851900  | 0.02088900  |
| N | 0.69624300  | -1.19385500 | 0.01861700  |
| C | 3.41023300  | -0.96256200 | -0.08600800 |
| H | 3.27552300  | -1.47042700 | -1.04983100 |
| H | 4.44843900  | -0.63799300 | 0.00814600  |
| H | 3.19690800  | -1.68984100 | 0.69711100  |
| O | -2.86505600 | -0.64865600 | -0.02786700 |
| H | -3.38471500 | 0.14855300  | 0.10627900  |
| C | -2.06073400 | 2.10809100  | -0.07731000 |
| H | -2.81988200 | 1.90861600  | -0.84190100 |
| H | -2.58040900 | 2.23671000  | 0.88043300  |
| H | -1.60948700 | 3.06478700  | -0.33092300 |
| C | -1.11827000 | -2.82299300 | 0.03808900  |
| H | -1.76440400 | -3.00704400 | 0.90162500  |
| H | -1.71533000 | -3.04470600 | -0.85196300 |
| H | -0.26435700 | -3.49839800 | 0.07433500  |
| C | 0.97238700  | 2.56369900  | 0.08705500  |
| H | 1.75859400  | 2.57368100  | 0.84850600  |
| H | 1.44113300  | 2.84750000  | -0.86488100 |
| H | 0.26353400  | 3.34937800  | 0.34355000  |
| N | 2.55093300  | 0.20133500  | 0.07445300  |
| H | 2.90032500  | 1.03888000  | -0.36395900 |

**4d•**  $H = -534.54606$  a.u.

|   |             |             |             |
|---|-------------|-------------|-------------|
| C | 1.11761800  | 0.06223500  | -0.00228100 |
| C | -0.61346100 | -1.44812300 | -0.00150200 |
| C | -1.61146700 | -0.38385900 | 0.00122600  |
| C | -1.10588800 | 0.98713400  | 0.00091100  |
| C | 0.25185400  | 1.20722400  | -0.00147400 |
| N | 0.68560400  | -1.21301000 | -0.00254200 |
| C | 3.41178800  | -0.87858600 | 0.00676600  |
| H | 3.25816600  | -1.53219700 | -0.85429300 |

|   |             |             |             |
|---|-------------|-------------|-------------|
| H | 4.42164700  | -0.46887300 | -0.02758900 |
| H | 3.29943800  | -1.48520000 | 0.90885900  |
| O | -2.83333000 | -0.65225800 | 0.00332100  |
| C | -2.12994000 | 2.08972000  | 0.00293200  |
| H | -3.12464500 | 1.64683700  | 0.00610800  |
| H | -2.03163100 | 2.73084000  | 0.88457500  |
| H | -2.03684800 | 2.72909300  | -0.88061200 |
| C | -1.08799900 | -2.86831900 | -0.00280400 |
| H | -1.71976800 | -3.06281200 | 0.86886500  |
| H | -1.71567500 | -3.06246800 | -0.87758900 |
| H | -0.23494100 | -3.54577300 | -0.00123400 |
| C | 0.86109000  | 2.58832300  | -0.00368200 |
| H | 1.48499200  | 2.75403700  | 0.88312300  |
| H | 1.49342500  | 2.74666300  | -0.88563300 |
| H | 0.09818800  | 3.36388000  | -0.01012500 |
| N | 2.46855600  | 0.22811100  | -0.00554900 |
| H | 2.83360800  | 1.16383500  | 0.01505500  |

**5a**  $H = -437.340388$  a.u.

|   |             |             |             |
|---|-------------|-------------|-------------|
| C | 0.89494700  | 0.30641600  | 0.00002800  |
| C | -0.85155900 | -1.17193500 | -0.00010800 |
| C | -1.79542300 | -0.15135300 | -0.00003500 |
| C | -1.33266600 | 1.16965200  | -0.00004700 |
| C | 0.02959200  | 1.41021600  | -0.00005100 |
| H | -1.18028100 | -2.20641100 | -0.00017200 |
| H | -2.03423600 | 1.99911800  | -0.00009400 |
| H | 0.43524500  | 2.41334300  | -0.00018900 |
| N | 0.46795600  | -0.94621200 | -0.00001300 |
| C | 3.10667900  | -0.55917500 | -0.00000400 |
| H | 4.11037500  | -0.13711600 | 0.00015400  |
| H | 2.95404500  | -1.17865000 | 0.88679600  |
| H | 2.95412300  | -1.17844800 | -0.88691200 |
| O | -3.12074300 | -0.49383300 | 0.00009500  |
| H | -3.65666600 | 0.30532100  | 0.00031300  |
| O | 2.22477900  | 0.56675800  | 0.00009300  |

**5a•**  $H = -436.711583$  a.u.

|   |             |             |             |
|---|-------------|-------------|-------------|
| C | 0.82815300  | 0.29826000  | -0.00000900 |
| C | -0.88153500 | -1.20219000 | 0.00023300  |
| C | -1.90054000 | -0.16833100 | -0.00000900 |
| C | -1.39247100 | 1.19187700  | 0.00011500  |
| C | -0.04913700 | 1.41876900  | 0.00011600  |
| H | -1.21544700 | -2.23616500 | 0.00043700  |
| H | -2.11410400 | 2.00028600  | 0.00031600  |
| H | 0.37955200  | 2.41335300  | 0.00025700  |
| N | 0.42144300  | -0.97232000 | 0.00017500  |
| C | 3.05815100  | -0.53437800 | -0.00009100 |
| H | 4.04470500  | -0.07653000 | -0.00012500 |
| H | 2.91743300  | -1.15111500 | 0.88829300  |
| H | 2.91750000  | -1.15136200 | -0.88827100 |
| O | -3.11782200 | -0.44755000 | -0.00033400 |

O 2.13589000 0.57051700 -0.00019800

**5b**  $H = -515.804474$  a.u.

C -1.21345300 -0.48918000 0.00002800  
C 0.33584900 1.20640400 0.00004300  
C 1.38434400 0.28569800 0.00000500  
C 1.10703500 -1.09107400 -0.00000800  
C -0.22558800 -1.47947900 0.00000400  
H -0.51234800 -2.52361800 -0.00003600  
N -0.94612100 0.80626200 0.00005400  
C -3.51746400 0.09732900 -0.00007900  
H -4.46150500 -0.44570700 -0.00007800  
H -3.44444700 0.73142700 0.88671400  
H -3.44433900 0.73130500 -0.88695200  
O 2.66405900 0.79023900 -0.00003900  
H 3.29730400 0.06665900 0.00025800  
O -2.50393400 -0.90996300 0.00007200  
C 2.22705600 -2.10020200 -0.00003500  
H 2.86564100 -1.99457200 -0.88509000  
H 2.86563800 -1.99460200 0.88502500  
H 1.83633400 -3.11788000 -0.00004500  
C 0.61391500 2.68419500 -0.00000800  
H 1.20010400 2.97507800 0.87692400  
H 1.19881200 2.97525600 -0.87775600  
H -0.32951500 3.22846100 0.00069800

**5b•**  $H = -515.18128$  a.u.

C -1.15496300 -0.49660500 0.00020300  
C 0.32358900 1.24505300 -0.00135400  
C 1.46908000 0.33573400 -0.00099800  
C 1.17127700 -1.09505500 0.00044500  
C -0.13850800 -1.48595800 0.00108400  
H -0.43265500 -2.52911900 0.00198600  
N -0.93400700 0.81696600 -0.00098400  
C -3.48130400 0.01546300 -0.00061400  
H -4.39489400 -0.57525200 0.00065100  
H -3.42961200 0.64806100 0.88647600  
H -3.43046200 0.64541400 -0.88964300  
O 2.63943700 0.77096700 -0.00173800  
O -2.41548300 -0.94894400 0.00030100  
C 2.32135100 -2.05285100 0.00057800  
H 2.95620400 -1.88468300 -0.87385600  
H 2.95846400 -1.88171600 0.87276700  
H 1.98100800 -3.08937500 0.00266500  
C 0.58123700 2.71801400 0.00115200  
H 1.13006700 3.00918300 0.90226200  
H 1.21892700 2.99801200 -0.84199500  
H -0.36118600 3.26175800 -0.04590700

**6a**  $H = -472.738328$  a.u.

|   |             |             |             |
|---|-------------|-------------|-------------|
| C | 0.55436500  | 0.00166600  | 0.00352700  |
| C | -1.39544900 | -1.19084400 | 0.00032600  |
| C | -2.14377100 | -0.01374000 | -0.00023500 |
| C | -1.40867500 | 1.16661000  | 0.00010000  |
| H | -1.90085500 | -2.15326700 | -0.00106600 |
| H | -1.91087900 | 2.13471100  | -0.00175800 |
| N | -0.06994000 | -1.19604200 | 0.00187800  |
| N | 1.92606100  | 0.00546400  | 0.01009100  |
| C | 2.69804900  | -1.22350600 | -0.00415900 |
| H | 3.31923200  | -1.27777300 | -0.90731200 |
| H | 3.36356800  | -1.26595500 | 0.86680500  |
| H | 2.02536800  | -2.07528000 | 0.01746300  |
| C | 2.68919200  | 1.23960000  | -0.00345600 |
| H | 3.30617600  | 1.30172400  | -0.90903100 |
| H | 2.01080600  | 2.08678500  | 0.02399600  |
| H | 3.35818900  | 1.28377600  | 0.86474500  |
| O | -3.51173200 | -0.08898300 | -0.00259100 |
| H | -3.87783600 | 0.80151700  | -0.00340900 |
| N | -0.07928800 | 1.19013700  | 0.00141300  |

**6a•**  $H = -472.116107$  a.u.

|   |             |             |             |
|---|-------------|-------------|-------------|
| C | 0.49353400  | 0.00000200  | 0.00009700  |
| C | -1.44093500 | -1.20554600 | 0.00010500  |
| C | -2.24407100 | -0.00001600 | -0.00003000 |
| C | -1.44093000 | 1.20553600  | 0.00014600  |
| H | -1.95365200 | -2.16506000 | 0.00016400  |
| H | -1.95369300 | 2.16502600  | 0.00023200  |
| N | -0.12987500 | -1.20774500 | 0.00016200  |
| N | 1.85286200  | 0.00000500  | -0.00003300 |
| C | 2.62651300  | -1.23414700 | -0.00008300 |
| H | 3.26712800  | -1.26948200 | -0.88763000 |
| H | 3.26719100  | -1.26953500 | 0.88742000  |
| H | 1.95310800  | -2.08453300 | -0.00006400 |
| C | 2.62650500  | 1.23414500  | -0.00013800 |
| H | 3.26711600  | 1.26945400  | -0.88769300 |
| H | 1.95310400  | 2.08453500  | -0.00015900 |
| H | 3.26719900  | 1.26956700  | 0.88735600  |
| O | -3.49286800 | 0.00000800  | -0.00030700 |
| N | -0.12988000 | 1.20775700  | 0.00019400  |

**6b**  $H = -551.207061$  a.u.

|   |             |             |             |
|---|-------------|-------------|-------------|
| C | 0.94444000  | 0.00178200  | 0.05195100  |
| C | -1.00434300 | -1.20582700 | 0.00882300  |
| C | -1.73353800 | -0.01122300 | 0.00258900  |
| C | -1.01631500 | 1.18438700  | 0.00611700  |
| N | 0.32676800  | -1.19508700 | 0.02964500  |
| N | 2.31949200  | 0.00546000  | 0.12651400  |
| C | 3.07214800  | -1.22342100 | -0.05871800 |
| H | 3.35943000  | -1.37375500 | -1.11017200 |
| H | 3.98547000  | -1.17904600 | 0.54114200  |



|   |             |             |             |
|---|-------------|-------------|-------------|
| H | 2.47148700  | -2.07126200 | 0.25721100  |
| C | 3.06147300  | 1.24262600  | -0.04257600 |
| H | 3.32279100  | 1.42529500  | -1.09577600 |
| H | 2.46606600  | 2.07924800  | 0.31166800  |
| H | 3.98889900  | 1.18499100  | 0.53373400  |
| O | -3.10775100 | -0.08902200 | -0.02262900 |
| H | -3.47829000 | 0.79846100  | -0.01540700 |
| N | 0.31915600  | 1.19083800  | 0.02670000  |
| C | -1.72038100 | 2.51707700  | -0.01953100 |
| H | -2.35844000 | 2.61998500  | -0.90523600 |
| H | -2.35205000 | 2.65644800  | 0.86586000  |
| H | -0.97945100 | 3.31431700  | -0.03801200 |
| C | -1.70929500 | -2.53214100 | -0.01350700 |
| H | -2.35483200 | -2.64222600 | 0.86291500  |
| H | -2.35762700 | -2.61274800 | -0.89078700 |
| H | -0.97448400 | -3.33556700 | -0.02701400 |

**6b** •  $H = -550.589069$  a.u.

|   |             |             |             |
|---|-------------|-------------|-------------|
| C | 0.89458800  | -0.00001300 | 0.00015400  |
| C | -1.03923100 | -1.22422100 | 0.00012200  |
| C | -1.82741300 | -0.00000700 | -0.00021100 |
| C | -1.03920100 | 1.22422800  | 0.00015300  |
| N | 0.27764100  | -1.20744200 | 0.00031300  |
| N | 2.25676500  | 0.00000100  | -0.00001900 |
| C | 3.03125200  | -1.23254300 | -0.00018900 |
| H | 3.67230600  | -1.26894700 | -0.88783000 |
| H | 3.67295500  | -1.26873600 | 0.88699200  |
| H | 2.35815300  | -2.08309700 | 0.00016600  |
| C | 3.03120500  | 1.23254900  | -0.00022700 |
| H | 3.67233500  | 1.26888200  | -0.88782100 |
| H | 2.35807500  | 2.08308100  | -0.00002700 |
| H | 3.67284400  | 1.26887100  | 0.88700100  |
| O | -3.07803700 | 0.00001700  | -0.00077500 |
| N | 0.27765700  | 1.20743400  | 0.00025400  |
| C | -1.75485500 | 2.53772600  | 0.00028900  |
| H | -2.40919000 | 2.61292800  | -0.87311800 |
| H | -2.40972300 | 2.61242800  | 0.87333500  |
| H | -1.03892800 | 3.35842100  | 0.00072500  |
| C | -1.75486600 | -2.53773400 | 0.00028300  |
| H | -2.41070300 | -2.61195400 | 0.87263000  |
| H | -2.40822300 | -2.61345800 | -0.87382300 |
| H | -1.03891900 | -3.35841000 | 0.00188700  |

**7a** •  $H = -531.85515$  a.u.

|   |             |             |             |
|---|-------------|-------------|-------------|
| C | -1.16865900 | -0.46648000 | 0.00002600  |
| C | 0.36838500  | 1.21546400  | -0.00000600 |
| C | 1.38296700  | 0.25689900  | 0.00000500  |
| C | 1.01111400  | -1.09256100 | -0.00000800 |
| N | -0.91700800 | 0.83980700  | 0.00000300  |
| C | -3.46963600 | 0.11403900  | -0.00003900 |
| H | -4.40800500 | -0.43805700 | 0.00000500  |

|   |             |             |             |
|---|-------------|-------------|-------------|
| H | -3.40201500 | 0.74752100  | 0.88726100  |
| H | -3.40197700 | 0.74736800  | -0.88743700 |
| O | 2.68436900  | 0.69214100  | 0.00002800  |
| H | 3.27795400  | -0.06500800 | 0.00009200  |
| N | -0.27338700 | -1.45276400 | 0.00000200  |
| C | 2.04400700  | -2.18880200 | -0.00003700 |
| H | 2.68778000  | -2.13697900 | -0.88607400 |
| H | 2.68777400  | -2.13706300 | 0.88601100  |
| H | 1.53877600  | -3.15281500 | -0.00007400 |
| C | 0.68724500  | 2.68185800  | -0.00002600 |
| H | 1.28308000  | 2.94988800  | 0.87739100  |
| H | 1.28412000  | 2.94965100  | -0.87679600 |
| H | -0.23808600 | 3.25571800  | -0.00060600 |
| O | -2.44801500 | -0.88614500 | 0.00005900  |

**7a** •  $H = -531.228775$  a.u.

|   |             |             |             |
|---|-------------|-------------|-------------|
| C | -1.11125400 | -0.47725700 | 0.00001900  |
| C | 0.36383000  | 1.25374500  | -0.00182100 |
| C | 1.46642900  | 0.30508800  | -0.00060200 |
| C | 1.06956800  | -1.10188100 | 0.00065000  |
| N | -0.89687200 | 0.84553100  | -0.00186100 |
| C | -3.43172600 | 0.04400800  | -0.00023200 |
| H | -4.34368100 | -0.54877900 | 0.00210700  |
| H | -3.38063700 | 0.67653600  | 0.88676900  |
| H | -3.38278000 | 0.67239400  | -0.89031600 |
| O | 2.66315000  | 0.66550300  | -0.00097900 |
| N | -0.19565100 | -1.46535000 | 0.00114900  |
| C | 2.13169500  | -2.15235000 | 0.00028900  |
| H | 2.77665500  | -2.03924400 | -0.87604200 |
| H | 2.78280200  | -2.03391800 | 0.87126400  |
| H | 1.67712000  | -3.14142900 | 0.00448300  |
| C | 0.65891200  | 2.71749600  | 0.00069100  |
| H | 1.20505800  | 2.99214000  | 0.90857200  |
| H | 1.31553200  | 2.97508600  | -0.83483300 |
| H | -0.26683300 | 3.28763500  | -0.05811400 |
| O | -2.36568700 | -0.91985200 | 0.00062000  |

**7b** •  $H = -571.084655$  a.u.

|   |             |             |             |
|---|-------------|-------------|-------------|
| C | -0.75536800 | -0.34314700 | -0.00002700 |
| C | 0.91098800  | 1.21149600  | -0.00001400 |
| C | 1.84665200  | 0.17556100  | 0.00000600  |
| C | 1.36870200  | -1.13992000 | -0.00000100 |
| N | -0.40019900 | 0.93937700  | -0.00003000 |
| C | -3.01938000 | 0.41463600  | -0.00000400 |
| H | -2.86004000 | 1.04233600  | 0.88131300  |
| H | -2.86008200 | 1.04231300  | -0.88134600 |
| O | 3.17866300  | 0.50599100  | 0.00002700  |
| H | 3.70996000  | -0.29610000 | 0.00003400  |
| N | 0.05971000  | -1.39710200 | -0.00001300 |
| C | 2.31166500  | -2.31454800 | 0.00000400  |
| H | 2.95743700  | -2.31370900 | -0.88605000 |

|   |             |             |             |
|---|-------------|-------------|-------------|
| H | 2.95738800  | -2.31374100 | 0.88609300  |
| H | 1.73177400  | -3.23559200 | -0.00002800 |
| C | 1.34607400  | 2.64773800  | -0.00000400 |
| H | 1.96172700  | 2.86681300  | 0.87732700  |
| H | 1.96265900  | 2.86656300  | -0.87673300 |
| H | 0.46998000  | 3.29423400  | -0.00052700 |
| O | -2.06337300 | -0.66041500 | -0.00001400 |
| C | -4.39750200 | -0.21719500 | 0.00003600  |
| H | -5.16501500 | 0.56142100  | 0.00004200  |
| H | -4.53785000 | -0.84141000 | -0.88511600 |
| H | -4.53780900 | -0.84138500 | 0.88521300  |

**7b•**  $H = -570.458542$  a.u.

|   |             |             |             |
|---|-------------|-------------|-------------|
| C | -0.70628500 | -0.33290000 | -0.00008000 |
| C | 0.93266900  | 1.24479900  | -0.00156400 |
| C | 1.93725000  | 0.19277300  | -0.00130200 |
| C | 1.40402900  | -1.16819000 | 0.00066100  |
| N | -0.36199700 | 0.96300500  | -0.00148300 |
| C | -2.98210800 | 0.41110600  | -0.00141100 |
| H | -2.82604700 | 1.03747900  | 0.87940500  |
| H | -2.82724000 | 1.03386900  | -0.88500700 |
| O | 3.16361800  | 0.43414300  | -0.00204900 |
| N | 0.10939800  | -1.40573900 | 0.00131400  |
| C | 2.35808800  | -2.31786800 | 0.00099500  |
| H | 3.01137500  | -2.26891800 | -0.87510500 |
| H | 3.01750600  | -2.26351300 | 0.87210000  |
| H | 1.80867100  | -3.25759600 | 0.00547700  |
| C | 1.37089900  | 2.67238600  | 0.00160100  |
| H | 1.94534500  | 2.88987400  | 0.90748000  |
| H | 2.04647500  | 2.86519800  | -0.83631600 |
| H | 0.50605100  | 3.33159300  | -0.05281700 |
| O | -1.99684000 | -0.65080900 | 0.00003200  |
| C | -4.34409000 | -0.25137700 | 0.00078400  |
| H | -5.12494700 | 0.51337100  | -0.00030500 |
| H | -4.47351800 | -0.87845100 | -0.88354400 |
| H | -4.47241500 | -0.87480700 | 0.88784500  |

**8**  $H = -704.558006$

|   |             |             |             |
|---|-------------|-------------|-------------|
| C | -0.13197000 | 0.00072100  | 0.00049400  |
| C | 1.80600500  | 1.14725200  | -0.38137900 |
| C | 2.53067000  | 0.00950400  | -0.00389200 |
| C | 1.81446100  | -1.12725300 | 0.37597300  |
| N | -1.54258700 | -0.00216900 | 0.00008300  |
| C | -2.35449100 | -1.08831500 | -0.36482500 |
| C | -2.35869700 | 1.08058100  | 0.36583000  |
| C | -3.65413200 | -0.68059000 | -0.23159300 |
| C | -3.65671300 | 0.66709800  | 0.23413000  |
| H | -4.51664600 | -1.28853600 | -0.45985600 |
| H | -4.52152100 | 1.27164400  | 0.46265300  |
| N | 0.47757300  | -1.11766400 | 0.38978800  |
| N | 0.47250400  | 1.12523300  | -0.38965600 |

|   |             |             |             |
|---|-------------|-------------|-------------|
| C | 2.50995500  | 2.40514000  | -0.79920500 |
| H | 3.10581700  | 2.80710600  | 0.02589400  |
| H | 3.20508900  | 2.20723600  | -1.61977200 |
| H | 1.77700400  | 3.14692600  | -1.11150800 |
| C | 2.51563100  | -2.39099900 | 0.79960200  |
| H | 3.10749500  | -2.81725200 | -0.01897800 |
| H | 3.19049100  | -2.21411700 | 1.64526700  |
| H | 1.77530800  | -3.12821400 | 1.10450700  |
| O | 3.89593900  | 0.08074700  | -0.02776100 |
| H | 4.27215600  | -0.76532800 | 0.23514000  |
| C | -1.84383200 | -2.39859100 | -0.87144300 |
| H | -1.13892200 | -2.27630500 | -1.70021300 |
| H | -1.33216300 | -2.97402800 | -0.09763300 |
| H | -2.69181800 | -2.98029400 | -1.23867300 |
| C | -1.85319300 | 2.39375200  | 0.87015300  |
| H | -1.14872800 | 2.27589800  | 1.69995000  |
| H | -1.34199700 | 2.96839400  | 0.09570300  |
| H | -2.70366500 | 2.97329200  | 1.23503700  |

8•  $H = -703.930117$  a.u.

|   |             |             |             |
|---|-------------|-------------|-------------|
| C | -0.08870300 | 0.00001700  | -0.00004600 |
| C | 1.83736400  | -1.20061200 | 0.25588300  |
| C | 2.62500700  | 0.00001500  | 0.00005200  |
| C | 1.83741100  | 1.20059600  | -0.25594100 |
| N | -1.47928900 | 0.00001100  | -0.00002800 |
| C | -2.30712900 | 1.13241400  | 0.22418900  |
| C | -2.30712000 | -1.13239800 | -0.22420100 |
| C | -3.59638300 | 0.70080300  | 0.14587700  |
| C | -3.59638000 | -0.70084000 | -0.14567000 |
| H | -4.46238200 | 1.32653600  | 0.29931100  |
| H | -4.46237800 | -1.32660900 | -0.29896300 |
| N | 0.51950500  | 1.17505700  | -0.25470500 |
| N | 0.51948100  | -1.17509600 | 0.25458200  |
| C | 2.54852600  | -2.48612500 | 0.52934100  |
| H | 3.13730800  | -2.78541600 | -0.34360500 |
| H | 3.26450900  | -2.35848600 | 1.34570000  |
| H | 1.83316900  | -3.26902200 | 0.77536700  |
| C | 2.54854600  | 2.48612500  | -0.52935800 |
| H | 3.13569400  | 2.78643200  | 0.34436100  |
| H | 3.26598100  | 2.35806700  | -1.34435900 |
| H | 1.83330500  | 3.26857000  | -0.77716000 |
| O | 3.87213400  | -0.00003100 | 0.00010700  |
| C | -1.83879100 | 2.50878400  | 0.57282200  |
| H | -1.14483500 | 2.51148700  | 1.41735400  |
| H | -1.33087400 | 3.00122800  | -0.25694300 |
| H | -2.71507100 | 3.09787300  | 0.85213500  |
| C | -1.83878500 | -2.50874200 | -0.57294600 |
| H | -1.14488100 | -2.51137600 | -1.41751900 |
| H | -1.33080400 | -3.00123100 | 0.25675700  |
| H | -2.71507000 | -3.09783000 | -0.85224100 |

**9a**  $H = -651.65762$  a.u.

|   |             |             |             |
|---|-------------|-------------|-------------|
| C | 1.44232900  | 1.17303900  | 0.05174800  |
| C | 0.07444300  | 0.88847600  | 0.05089800  |
| C | -0.33550300 | -0.46562200 | -0.01026200 |
| C | 1.86300700  | -1.19802600 | -0.07444900 |
| C | 2.34811500  | 0.10702200  | -0.01945200 |
| C | -2.31128600 | 1.51971300  | -0.37470200 |
| H | -3.07845500 | 2.26693600  | -0.15330600 |
| H | -2.28901100 | 1.38730200  | -1.46215200 |
| C | -0.94919900 | 1.99677700  | 0.11862800  |
| H | -0.62045100 | 2.85448100  | -0.47530800 |
| H | -1.03643300 | 2.36219600  | 1.15108900  |
| C | 1.95360600  | 2.59024400  | 0.13149500  |
| H | 1.71897200  | 3.14654100  | -0.78259800 |
| H | 1.49564200  | 3.13129500  | 0.96422000  |
| H | 3.03351800  | 2.60437500  | 0.26263500  |
| C | 2.80572500  | -2.37554900 | -0.14293900 |
| H | 2.22480000  | -3.29599900 | -0.17037900 |
| H | 3.43458900  | -2.34548900 | -1.04149500 |
| H | 3.47071000  | -2.42109000 | 0.72879500  |
| C | -4.09863100 | -0.23297600 | -0.22258000 |
| H | -4.48326600 | -1.10534700 | 0.30720800  |
| H | -4.80218000 | 0.58695900  | -0.05797300 |
| H | -4.07752000 | -0.45917000 | -1.29263700 |
| C | -2.03249000 | -2.20178500 | 0.31228400  |
| H | -1.17622300 | -2.83589400 | 0.10796200  |
| H | -2.28790200 | -2.29226900 | 1.38042300  |
| H | -2.88008800 | -2.55428300 | -0.27661200 |
| N | -1.69223000 | -0.82864700 | -0.04690600 |
| O | 3.69657800  | 0.39593000  | -0.02683100 |
| H | 4.19326400  | -0.42663400 | -0.05966500 |
| C | -2.70738400 | 0.18700000  | 0.26371800  |
| H | -2.76094900 | 0.32957800  | 1.35963200  |
| N | 0.55393900  | -1.46147000 | -0.06474000 |

**9a•**  $H = -651.040834$  a.u.

|   |             |             |             |
|---|-------------|-------------|-------------|
| C | 1.46655700  | 1.19935100  | 0.05091700  |
| C | 0.12174700  | 0.91700600  | 0.12143200  |
| C | -0.29856200 | -0.45256200 | 0.08416800  |
| C | 1.86781900  | -1.23663900 | -0.08579200 |
| C | 2.42752600  | 0.11131900  | -0.06963400 |
| C | -2.23998500 | 1.54185700  | -0.36085400 |
| H | -3.02443800 | 2.28529200  | -0.19664500 |
| H | -2.11551500 | 1.43609800  | -1.44456600 |
| C | -0.92453400 | 1.99474600  | 0.26324700  |
| H | -0.58306600 | 2.91958400  | -0.20592100 |
| H | -1.07860300 | 2.22785400  | 1.32583200  |
| C | 2.01391100  | 2.59876900  | 0.10802100  |
| H | 1.67436700  | 3.19910600  | -0.74312900 |
| H | 1.69972500  | 3.11923200  | 1.01812800  |
| H | 3.10176600  | 2.55478700  | 0.08474300  |

|   |             |             |             |
|---|-------------|-------------|-------------|
| C | 2.81329700  | -2.39399500 | -0.19272900 |
| H | 2.25800100  | -3.33104400 | -0.21410000 |
| H | 3.42741200  | -2.30436900 | -1.09342300 |
| H | 3.51323300  | -2.39638900 | 0.64831000  |
| C | -3.96812100 | -0.27126100 | -0.51798000 |
| H | -4.41247500 | -1.15665100 | -0.06215400 |
| H | -4.71819300 | 0.52277800  | -0.49274000 |
| H | -3.74306500 | -0.49559200 | -1.56429000 |
| C | -2.01012400 | -2.18041900 | 0.43416900  |
| H | -1.10937000 | -2.76508800 | 0.58583500  |
| H | -2.63237600 | -2.21643200 | 1.33588100  |
| H | -2.57407900 | -2.61437600 | -0.39528200 |
| N | -1.62935200 | -0.79756900 | 0.15373600  |
| O | 3.66154800  | 0.29749700  | -0.14705500 |
| C | -2.70846300 | 0.20711700  | 0.21550700  |
| H | -2.96738800 | 0.35567100  | 1.27678900  |
| N | 0.57582100  | -1.47845600 | -0.00940200 |

**9b**  $H = -690.887874$  a.u.

|   |             |             |             |
|---|-------------|-------------|-------------|
| C | 1.60935200  | 1.18515900  | -0.02288400 |
| C | 0.24969100  | 0.87722800  | -0.10991300 |
| C | -0.13509200 | -0.48562700 | -0.14592900 |
| C | 2.07301600  | -1.18128100 | -0.02337600 |
| C | 2.53366200  | 0.13301500  | 0.01165600  |
| C | -2.53671500 | 0.11024700  | 0.04928800  |
| C | -2.14179400 | 1.44108800  | -0.62169300 |
| H | -2.92245700 | 2.18359800  | -0.43275400 |
| H | -2.11160400 | 1.27002100  | -1.70250300 |
| C | -0.78958400 | 1.97012700  | -0.15261900 |
| H | -0.46556900 | 2.77586700  | -0.81874200 |
| H | -0.88668600 | 2.43150100  | 0.83924100  |
| C | 2.09023800  | 2.61381100  | 0.03128800  |
| H | 1.89426800  | 3.13197100  | -0.91378000 |
| H | 1.57708700  | 3.17538200  | 0.81729000  |
| H | 3.16085800  | 2.65524200  | 0.21992100  |
| C | 3.03496200  | -2.34424600 | 0.02362600  |
| H | 2.46842200  | -3.27401400 | 0.01610000  |
| H | 3.71171900  | -2.35197100 | -0.83986400 |
| H | 3.65193200  | -2.33218600 | 0.93121100  |
| C | -3.88063200 | -0.32742600 | -0.55880700 |
| H | -4.31411400 | -1.18764800 | -0.04552600 |
| H | -4.59719500 | 0.49354200  | -0.47610500 |
| H | -3.76441200 | -0.57453300 | -1.61705700 |
| C | -2.69790300 | 0.27926000  | 1.57622400  |
| H | -3.45558700 | 1.03466800  | 1.80622600  |
| H | -3.01365800 | -0.66067100 | 2.03603100  |
| H | -1.76006800 | 0.58094200  | 2.04713300  |
| C | -1.76355400 | -2.29293900 | -0.07244500 |
| H | -1.01022700 | -2.88069600 | -0.58936900 |
| H | -1.74245200 | -2.59285100 | 0.98581700  |
| H | -2.74050600 | -2.53304700 | -0.48661800 |

|   |             |             |             |
|---|-------------|-------------|-------------|
| N | -1.47542800 | -0.87542300 | -0.26848000 |
| O | 3.87506700  | 0.44549300  | 0.08656100  |
| H | 4.38394100  | -0.36887800 | 0.13370900  |
| N | 0.76998500  | -1.46895900 | -0.08999800 |

**9b•**  $H = -690.270891$  a.u.

|   |             |             |             |
|---|-------------|-------------|-------------|
| C | 1.64357400  | 1.21189900  | 0.00084600  |
| C | 0.30383900  | 0.89655400  | -0.04107200 |
| C | -0.08027100 | -0.48486900 | -0.05207800 |
| C | 2.11712200  | -1.21079800 | -0.02341800 |
| C | 2.63941100  | 0.15109900  | 0.01178300  |
| C | -2.51464300 | 0.11762100  | 0.00300500  |
| C | -2.05532300 | 1.42580100  | -0.66369000 |
| H | -2.85712900 | 2.16363800  | -0.57388500 |
| H | -1.91290800 | 1.23295300  | -1.73228700 |
| C | -0.75866100 | 1.96695600  | -0.07414900 |
| H | -0.41320400 | 2.81703200  | -0.66763100 |
| H | -0.93094400 | 2.35949800  | 0.93591700  |
| C | 2.14471000  | 2.62871800  | 0.03382100  |
| H | 1.90184000  | 3.16169100  | -0.89245400 |
| H | 1.70288500  | 3.19653000  | 0.85855100  |
| H | 3.22766300  | 2.61990600  | 0.14806000  |
| C | 3.09729600  | -2.34419400 | -0.02406200 |
| H | 2.56975900  | -3.29690400 | -0.05443600 |
| H | 3.77244800  | -2.26589400 | -0.88129900 |
| H | 3.73458000  | -2.30005700 | 0.86409800  |
| C | -3.73551800 | -0.40366700 | -0.77586300 |
| H | -4.18085400 | -1.28744000 | -0.31647600 |
| H | -4.50094400 | 0.37547800  | -0.79826500 |
| H | -3.46810300 | -0.64540100 | -1.80741000 |
| C | -2.90313300 | 0.35012400  | 1.47893000  |
| H | -3.70952800 | 1.08554800  | 1.54835600  |
| H | -3.25642400 | -0.57428600 | 1.94172500  |
| H | -2.05529500 | 0.71180300  | 2.06300700  |
| C | -1.74715800 | -2.28630800 | 0.05294700  |
| H | -0.83433200 | -2.84960700 | 0.21125400  |
| H | -2.42334500 | -2.44438900 | 0.89791900  |
| H | -2.23414400 | -2.65089400 | -0.85533200 |
| N | -1.40231400 | -0.86968400 | -0.06743900 |
| O | 3.87034100  | 0.37019300  | 0.04670400  |
| N | 0.83056700  | -1.48522600 | -0.05042400 |

**9c**  $H = -726.797496$  a.u.

|   |             |             |             |
|---|-------------|-------------|-------------|
| C | 1.56256700  | 1.18940300  | -0.03754700 |
| C | 0.21682800  | 0.84063700  | -0.13441700 |
| C | -0.13737700 | -0.52576700 | -0.15509400 |
| C | 2.07811900  | -1.17004100 | -0.01431200 |
| C | 2.50799700  | 0.15645600  | 0.02019300  |
| C | -2.48351800 | 0.12502400  | 0.05912500  |
| C | -0.86255800 | 1.88635900  | -0.22671900 |
| H | -0.63056800 | 2.61557600  | -1.00734100 |

|   |             |             |             |
|---|-------------|-------------|-------------|
| H | -0.94803100 | 2.44759700  | 0.71771100  |
| C | 1.99896800  | 2.63262200  | -0.01156200 |
| H | 1.75347700  | 3.13324800  | -0.95436800 |
| H | 1.49413600  | 3.18534300  | 0.78679500  |
| H | 3.07285200  | 2.71191400  | 0.14240500  |
| C | 3.06858700  | -2.30783000 | 0.04389500  |
| H | 2.52668800  | -3.25193900 | 0.02444000  |
| H | 3.75835900  | -2.29508800 | -0.80913600 |
| H | 3.67062100  | -2.28264500 | 0.96100500  |
| C | -3.84219800 | -0.21742500 | -0.55045200 |
| H | -4.31188500 | -1.07125500 | -0.06119000 |
| H | -4.49412000 | 0.64922400  | -0.43459400 |
| H | -3.72621300 | -0.42498900 | -1.61529000 |
| C | -2.60006700 | 0.33363100  | 1.58059000  |
| H | -3.30386100 | 1.14134300  | 1.79537700  |
| H | -2.96332500 | -0.57773100 | 2.06120100  |
| H | -1.63491300 | 0.58155200  | 2.02628700  |
| C | -1.81760000 | -2.30680000 | -0.10037700 |
| H | -1.00664000 | -2.90759300 | -0.50228300 |
| H | -1.95097400 | -2.59191900 | 0.95406800  |
| H | -2.73239200 | -2.53784300 | -0.64490300 |
| N | -1.47560300 | -0.90097100 | -0.27027400 |
| O | 3.83950800  | 0.50089400  | 0.10966100  |
| H | 4.36972100  | -0.30018200 | 0.14945000  |
| N | 0.78212000  | -1.49218300 | -0.09007500 |
| O | -2.11788800 | 1.33783700  | -0.59805200 |

9c•  $H = -726.179839$  a.u.

|   |             |             |             |
|---|-------------|-------------|-------------|
| C | 1.59242900  | 1.22121800  | -0.01944400 |
| C | 0.26723600  | 0.86333000  | -0.08235700 |
| C | -0.08361900 | -0.52145000 | -0.07901000 |
| C | 2.12197000  | -1.19501200 | -0.01240700 |
| C | 2.61058400  | 0.18184900  | 0.02760600  |
| C | -2.46521300 | 0.13092100  | 0.02692100  |
| C | -0.83405300 | 1.88581900  | -0.16999800 |
| H | -0.58608300 | 2.65737900  | -0.90090600 |
| H | -0.98732500 | 2.39169500  | 0.79471500  |
| C | 2.04784800  | 2.65297000  | -0.01309700 |
| H | 1.76976400  | 3.16452400  | -0.94146900 |
| H | 1.60295800  | 3.21717100  | 0.81312800  |
| H | 3.13206400  | 2.68222600  | 0.08472500  |
| C | 3.13085800  | -2.30198900 | 0.00686400  |
| H | 2.62823900  | -3.26812200 | -0.01795900 |
| H | 3.81033100  | -2.21539300 | -0.84624700 |
| H | 3.75967400  | -2.23174400 | 0.89919700  |
| C | -3.72386900 | -0.29037000 | -0.73031800 |
| H | -4.20163600 | -1.16370500 | -0.28639000 |
| H | -4.42742900 | 0.54224800  | -0.70330800 |
| H | -3.47666000 | -0.49893000 | -1.77216300 |
| C | -2.76659300 | 0.39174700  | 1.51330600  |
| H | -3.51253600 | 1.18434900  | 1.60357700  |



|   |             |             |             |
|---|-------------|-------------|-------------|
| H | -3.16051300 | -0.50861700 | 1.98944600  |
| H | -1.86825900 | 0.68854600  | 2.05701300  |
| C | -1.77545300 | -2.30902800 | -0.01677400 |
| H | -0.86497500 | -2.89574500 | 0.05071800  |
| H | -2.39132800 | -2.49734100 | 0.86844700  |
| H | -2.33451300 | -2.61545000 | -0.90403600 |
| N | -1.40118500 | -0.89985600 | -0.09744900 |
| O | 3.83394900  | 0.43130100  | 0.08798200  |
| N | 0.84238400  | -1.50453600 | -0.05971900 |
| O | -2.04806400 | 1.31090100  | -0.63749100 |

**10**  $H = -659.968829$  a.u.

|   |             |             |             |
|---|-------------|-------------|-------------|
| C | 0.00943600  | 2.27994300  | -0.00862800 |
| C | -1.18332300 | 1.56638200  | -0.00785600 |
| C | -1.22757400 | 0.16667900  | -0.00044000 |
| C | 0.00837300  | -0.51473800 | 0.00464700  |
| C | 1.24734200  | 0.16607900  | 0.00011500  |
| C | 1.20407900  | 1.56051500  | -0.00654300 |
| H | -2.10792900 | 2.12708100  | -0.01441500 |
| H | 2.13112500  | 2.11811000  | -0.01203800 |
| C | -2.58773300 | -0.57729100 | -0.00083400 |
| C | 2.59594000  | -0.59102400 | -0.00087000 |
| C | 0.01733800  | 3.79097300  | 0.01010100  |
| H | 0.26347000  | 4.17763600  | 1.00536600  |
| H | 0.75739700  | 4.19620100  | -0.68580800 |
| H | -0.95819500 | 4.19728900  | -0.26675200 |
| C | 2.72463800  | -1.46437600 | 1.27091200  |
| H | 1.94058100  | -2.21706600 | 1.32471300  |
| H | 3.69317100  | -1.97466400 | 1.27418100  |
| H | 2.66983000  | -0.84323300 | 2.16984700  |
| C | 3.79604300  | 0.37839500  | -0.00709900 |
| H | 3.80715600  | 1.01439700  | -0.89642700 |
| H | 3.81119700  | 1.02082200  | 0.87753300  |
| H | 4.72227800  | -0.20218800 | -0.00716800 |
| C | 2.71824500  | -1.47291900 | -1.26738800 |
| H | 2.65896000  | -0.85776000 | -2.17014600 |
| H | 3.68669700  | -1.98335300 | -1.27214200 |
| H | 1.93386200  | -2.22585900 | -1.31213500 |
| C | -3.77941100 | 0.40401200  | -0.00746400 |
| H | -3.78046800 | 1.03872300  | -0.89661200 |
| H | -4.71272100 | -0.16519600 | -0.00694900 |
| H | -3.78404800 | 1.04636500  | 0.87616000  |
| C | -2.75055900 | -1.43616000 | 1.28126200  |
| H | -1.98980300 | -2.20992000 | 1.40982800  |
| H | -2.69980800 | -0.79954700 | 2.16788500  |
| H | -3.72332600 | -1.93670600 | 1.27680900  |
| C | -2.74478000 | -1.44682700 | -1.27643200 |
| H | -3.71747600 | -1.94752100 | -1.27218100 |
| H | -2.69015400 | -0.81760100 | -2.16808900 |
| H | -1.98330200 | -2.22149900 | -1.39511400 |
| O | 0.07432400  | -1.89177900 | 0.01041100  |

H -0.81140700 -2.25813600 0.00946600

**10•**  $H = -659.345993$  a.u.

C 0.00007300 2.25495700 -0.01478400  
C -1.21651700 1.54527200 -0.01267000  
C -1.27232000 0.16850300 -0.00194200  
C -0.00018000 -0.58066600 0.00742200  
C 1.27228100 0.16826000 -0.00185400  
C 1.21683800 1.54468300 -0.01248300  
H -2.13145400 2.12372900 -0.02110600  
H 2.13194200 2.12297500 -0.02075200  
C -2.60461600 -0.59479000 -0.00167300  
C 2.60427000 -0.59555800 -0.00167700  
C 0.00152100 3.75840400 0.01522400  
H 0.03278100 4.12317300 1.04954300  
H 0.87419600 4.16921900 -0.49777300  
H -0.89845300 4.17057300 -0.44633500  
C 2.71011900 -1.47125400 1.27229800  
H 1.91433200 -2.21250300 1.30587600  
H 3.67363200 -1.99006700 1.28139600  
H 2.65355700 -0.85361000 2.17376300  
C 3.81398700 0.35976100 -0.01547200  
H 3.82989200 0.99154700 -0.90819500  
H 3.83865600 1.00609300 0.86656400  
H 4.73421400 -0.22964700 -0.01515100  
C 2.69829500 -1.49283800 -1.26152900  
H 2.63255800 -0.89057200 -2.17272300  
H 3.66198800 -2.01130500 -1.27124300  
H 1.90272300 -2.23495400 -1.27473000  
C -3.81404200 0.36088700 -0.01536100  
H -3.82940000 0.99319500 -0.90772000  
H -4.73443500 -0.22827100 -0.01574400  
H -3.83887900 1.00668300 0.86705600  
C -2.71079500 -1.47042900 1.27232800  
H -1.91551300 -2.21222100 1.30569300  
H -2.65362300 -0.85284100 2.17379200  
H -3.67467000 -1.98857100 1.28160800  
C -2.69916500 -1.49205000 -1.26150700  
H -3.66321900 -2.00984500 -1.27125900  
H -2.63296100 -0.88985700 -2.17271700  
H -1.90409400 -2.23469300 -1.27459600  
O -0.00028100 -1.83088400 0.02085500

**11**  $H = -735.096534$  a.u.

C -0.30566000 1.97855400 0.00003000  
C 1.00506000 1.51167000 0.00014000  
C 1.29745400 0.14883100 0.00013800  
C 0.20604100 -0.75288100 0.00025300  
C -1.13072500 -0.31016600 0.00001300  
C -1.35978100 1.07234600 -0.00008600  
H 1.78797300 2.25538500 0.00010000

|   |             |             |             |
|---|-------------|-------------|-------------|
| H | -2.37424000 | 1.43642100  | -0.00029800 |
| C | 2.77146200  | -0.32950200 | -0.00012500 |
| C | -2.31908600 | -1.30124600 | -0.00006700 |
| C | -2.27755200 | -2.18658600 | -1.26934300 |
| H | -1.36396300 | -2.77514700 | -1.32009200 |
| H | -3.13075100 | -2.87253400 | -1.27146200 |
| H | -2.34137700 | -1.56846900 | -2.16973400 |
| C | -3.67944800 | -0.57413200 | -0.00049700 |
| H | -3.81445300 | 0.05017100  | 0.88715000  |
| H | -3.81399600 | 0.04993700  | -0.88837500 |
| H | -4.47975700 | -1.31876400 | -0.00059700 |
| C | -2.27807300 | -2.18611400 | 1.26954600  |
| H | -2.34225500 | -1.56767300 | 2.16968800  |
| H | -3.13126800 | -2.87207100 | 1.27158300  |
| H | -1.36450400 | -2.77465900 | 1.32083900  |
| C | 3.76058500  | 0.85383000  | -0.00077700 |
| H | 3.64392500  | 1.48179600  | 0.88529300  |
| H | 4.78308800  | 0.46727600  | -0.00116100 |
| H | 3.64309500  | 1.48139100  | -0.88701300 |
| C | 3.08173500  | -1.15171200 | -1.27947200 |
| H | 2.45924200  | -2.04016800 | -1.40914200 |
| H | 2.93010700  | -0.53327000 | -2.16749800 |
| H | 4.12435100  | -1.48296900 | -1.26951200 |
| C | 3.08261800  | -1.15085400 | 1.27958500  |
| H | 4.12536700  | -1.48167100 | 1.26936900  |
| H | 2.93101500  | -0.53204600 | 2.16735500  |
| H | 2.46081700  | -2.03971000 | 1.41022300  |
| O | 0.39871600  | -2.12174500 | 0.00026000  |
| H | 1.33734100  | -2.31540500 | 0.00360700  |
| O | -0.44698500 | 3.34322700  | 0.00006100  |
| C | -1.75677500 | 3.88442300  | 0.00011400  |
| H | -2.31895500 | 3.58737600  | 0.89357300  |
| H | -1.63283000 | 4.96660000  | 0.00023800  |
| H | -2.31895000 | 3.58758300  | -0.89341800 |

11•  $H = -734.478788$  a.u.

|   |             |             |             |
|---|-------------|-------------|-------------|
| C | 0.27877800  | 1.95629400  | -0.00003900 |
| C | 1.36354300  | 1.06406800  | -0.00001100 |
| C | 1.15960300  | -0.30200900 | 0.00003500  |
| C | -0.22097500 | -0.81813900 | 0.00008200  |
| C | -1.34040900 | 0.14487900  | 0.00000000  |
| C | -1.05147000 | 1.48495800  | -0.00007500 |
| H | 2.36826400  | 1.45747100  | -0.00011300 |
| H | -1.82692400 | 2.23853600  | -0.00012400 |
| C | 2.33772500  | -1.28832800 | -0.00001500 |
| C | -2.78719500 | -0.37038400 | -0.00000400 |
| C | -3.04118000 | -1.22477500 | -1.26697600 |
| H | -2.38621000 | -2.09333900 | -1.29388900 |
| H | -4.08009700 | -1.56899800 | -1.27506500 |
| H | -2.87751300 | -0.63281000 | -2.17264700 |
| C | -3.80649900 | 0.78467400  | -0.00008300 |

|   |             |             |             |
|---|-------------|-------------|-------------|
| H | -3.71157700 | 1.41700800  | 0.88724200  |
| H | -3.71136900 | 1.41707700  | -0.88733900 |
| H | -4.81728000 | 0.36919300  | -0.00022400 |
| C | -3.04128100 | -1.22467100 | 1.26702200  |
| H | -2.87771900 | -0.63261400 | 2.17265300  |
| H | -4.08019200 | -1.56891300 | 1.27503800  |
| H | -2.38629300 | -2.09321400 | 1.29408800  |
| C | 3.69922600  | -0.56599800 | -0.00009400 |
| H | 3.83617000  | 0.05778300  | 0.88823800  |
| H | 4.49817700  | -1.31159400 | -0.00013100 |
| H | 3.83606400  | 0.05776000  | -0.88846300 |
| C | 2.27746900  | -2.17816000 | -1.26699800 |
| H | 1.35986200  | -2.76194900 | -1.29111100 |
| H | 2.32982900  | -1.56697500 | -2.17314300 |
| H | 3.13077400  | -2.86338200 | -1.27451000 |
| C | 2.27756800  | -2.17811800 | 1.26697900  |
| H | 3.13083200  | -2.86338900 | 1.27441600  |
| H | 2.33006500  | -1.56691800 | 2.17311300  |
| H | 1.35992700  | -2.76185500 | 1.29121600  |
| O | -0.43981900 | -2.05033700 | 0.00014800  |
| O | 0.40122800  | 3.30238600  | -0.00012100 |
| C | 1.69952900  | 3.89282500  | 0.00015500  |
| H | 2.26320400  | 3.61224600  | -0.89470900 |
| H | 1.53116500  | 4.96780700  | 0.00029000  |
| H | 2.26296500  | 3.61196400  | 0.89508500  |

12  $H = -694.718583$  a.u.

|   |             |             |             |
|---|-------------|-------------|-------------|
| C | 1.30164500  | 1.38154900  | -0.02555800 |
| C | -0.02067200 | 0.91877000  | -0.12690300 |
| C | -0.27269400 | -0.45835000 | -0.13721300 |
| C | 2.09163100  | -0.93450200 | -0.00870200 |
| C | 2.33655000  | 0.44667100  | 0.02919500  |
| C | -2.67633100 | -0.11683500 | 0.06361000  |
| C | -2.46965000 | 1.22174100  | -0.65471000 |
| H | -3.32666600 | 1.87746300  | -0.47462700 |
| H | -2.43629400 | 1.01990500  | -1.73018400 |
| C | -1.16968100 | 1.90042700  | -0.21754000 |
| H | -0.92269400 | 2.69894300  | -0.92341300 |
| H | -1.31044700 | 2.39791000  | 0.75064500  |
| C | 1.60923900  | 2.85910800  | 0.01743800  |
| H | 1.38076700  | 3.34451700  | -0.93836000 |
| H | 1.01735600  | 3.36825200  | 0.78430900  |
| H | 2.66230000  | 3.02767700  | 0.23173300  |
| C | 3.27307200  | -1.87837500 | 0.03454200  |
| H | 2.97580600  | -2.91544300 | -0.10407800 |
| H | 3.99737400  | -1.64945700 | -0.75720700 |
| H | 3.80446300  | -1.82496200 | 0.99405600  |
| C | -3.88339800 | -0.86292300 | -0.49988800 |
| H | -3.97115400 | -1.84809800 | -0.03615000 |
| H | -4.80342500 | -0.30527700 | -0.30638700 |
| H | -3.77640300 | -0.99996300 | -1.57809400 |

|   |             |             |             |
|---|-------------|-------------|-------------|
| C | -2.79649400 | 0.04109400  | 1.58542300  |
| H | -3.63754400 | 0.69258800  | 1.83945700  |
| H | -2.96315200 | -0.93431400 | 2.04787500  |
| H | -1.88974700 | 0.46756300  | 2.01783000  |
| O | 3.62339400  | 0.93818900  | 0.11329700  |
| H | 4.23682100  | 0.20543600  | 0.21284600  |
| O | -1.54846400 | -0.97572500 | -0.23475300 |
| C | 0.77102900  | -1.39854700 | -0.07905800 |
| C | 0.45010100  | -2.87618000 | -0.10198100 |
| H | 0.81822100  | -3.35331700 | -1.01678400 |
| H | 0.90382700  | -3.39978700 | 0.74481500  |
| H | -0.62492200 | -3.03122600 | -0.05856900 |

12•  $H = -694.097226$  a.u.

|   |             |             |             |
|---|-------------|-------------|-------------|
| C | 1.31954800  | 1.42234600  | -0.01707100 |
| C | 0.01699700  | 0.96242800  | -0.09423200 |
| C | -0.21833100 | -0.43244500 | -0.09378900 |
| C | 2.13937400  | -0.95546300 | -0.00353900 |
| C | 2.43455500  | 0.47989000  | 0.03485300  |
| C | -2.64212000 | -0.12516300 | 0.04898600  |
| C | -2.41953200 | 1.20432400  | -0.67675500 |
| H | -3.29833000 | 1.84167400  | -0.54503400 |
| H | -2.33091000 | 0.99470200  | -1.74772700 |
| C | -1.15605600 | 1.91435900  | -0.18635900 |
| H | -0.91211600 | 2.73491600  | -0.86623300 |
| H | -1.33573300 | 2.38209300  | 0.78934900  |
| C | 1.64665400  | 2.88862100  | 0.00665500  |
| H | 1.36965300  | 3.37658400  | -0.93530700 |
| H | 1.10970100  | 3.40913000  | 0.80650600  |
| H | 2.71706700  | 3.01718600  | 0.15525700  |
| C | 3.31687500  | -1.89307600 | 0.03771900  |
| H | 3.27853200  | -2.54991700 | 0.91266800  |
| H | 3.35220600  | -2.53377900 | -0.84905900 |
| H | 4.23580700  | -1.31178300 | 0.08272700  |
| C | -3.77954100 | -0.92264200 | -0.58234900 |
| H | -3.86744300 | -1.90196400 | -0.10727700 |
| H | -4.72714100 | -0.39190200 | -0.46144700 |
| H | -3.59663000 | -1.07229600 | -1.64844100 |
| C | -2.86108500 | 0.04560500  | 1.55630900  |
| H | -3.74451100 | 0.66193500  | 1.74366000  |
| H | -3.01486300 | -0.92918400 | 2.02359200  |
| H | -2.00397500 | 0.51927000  | 2.03789300  |
| O | 3.61431700  | 0.89201500  | 0.10458600  |
| O | -1.46213100 | -0.96785700 | -0.14033200 |
| C | 0.83471900  | -1.39308600 | -0.06479000 |
| C | 0.45513600  | -2.85338300 | -0.09676300 |
| H | 1.33122000  | -3.49723000 | -0.05319900 |
| H | -0.20037800 | -3.10455900 | 0.74179000  |
| H | -0.10281400 | -3.09202800 | -1.00700000 |
